# Supplementary material for: Antibacterial and Anti-Efflux Activities of Cinnamon Essential Oil against Pan and Extensive Drug-Resistant Pseudomonas aeruginosa Isolated from Human and Animal Sources
Source: MDPI journal article supplement (doi:10.3390/antibiotics12101514), 2023-10-05
Supplement: s1 [file s1]

Supplementary Materials

(A)

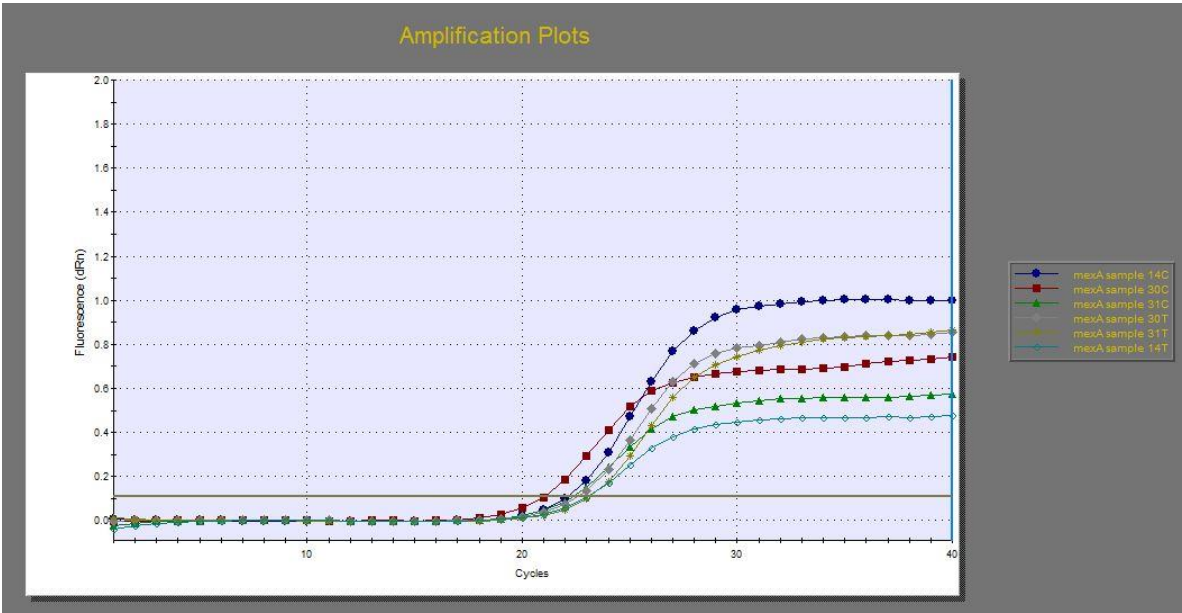

(B)

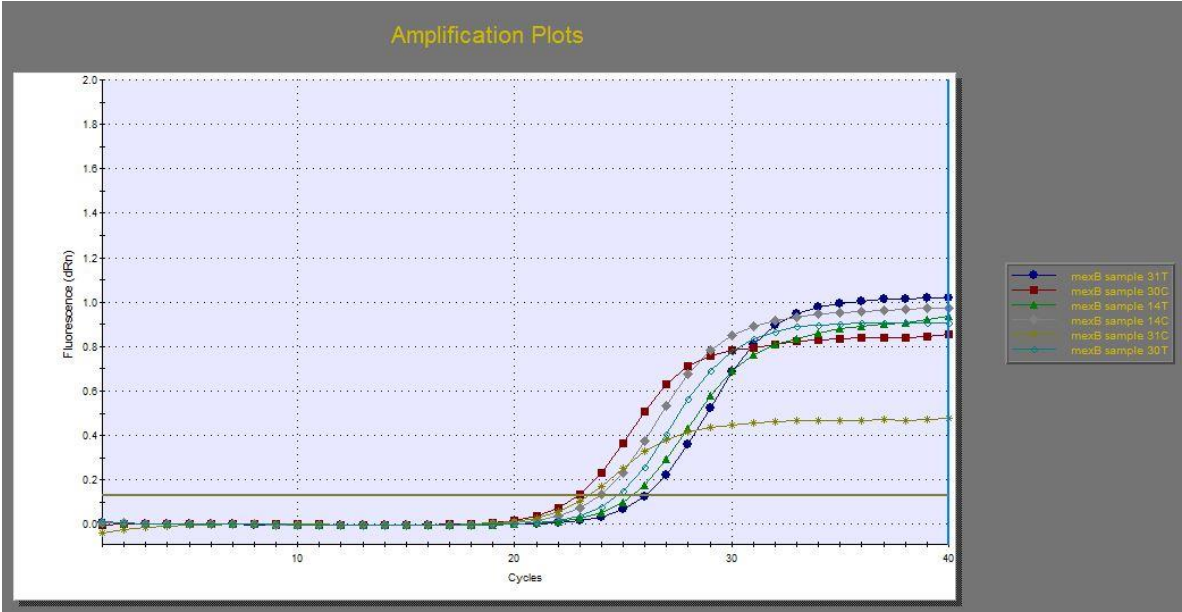

(C)

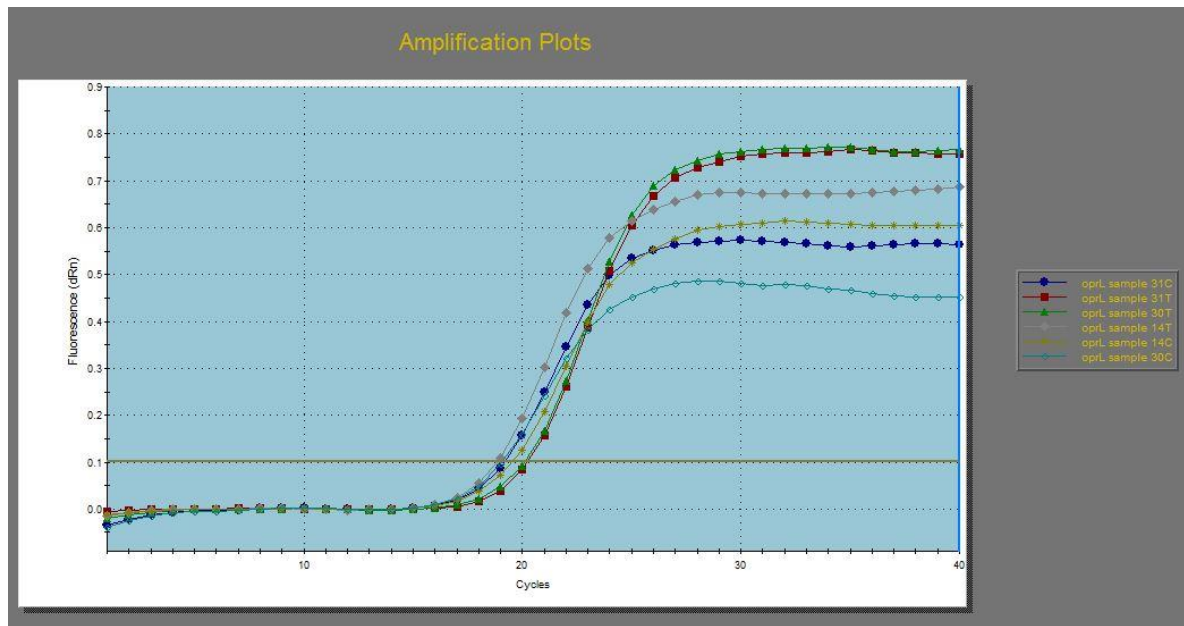

**Figure S1:** Data sheet of RT-qPCR showing amplification curves of *MexA* (A) *MexB* (B) and *OprL* (C) genes of *P. aeruginosa*.
